# Supplementary material for: Structural Refinement of Proteins by Restrained Molecular Dynamics Simulations with Non-interacting Molecular Fragments
Source: PubMed Central journal article supplement (PMC4624691; doi:10.1371/journal.pcbi.1004368), 2015-10-27
Supplement: pcbi.1004368.s005.pdf [file pcbi.1004368.s005.pdf]

**Table S1. Restraints applied to the metal bridges and the four transmembrane helices (secondary structure; S1: residues 170–184, S2: residues 224–238, S3: residues 260–275, S4: residues 284–305) were gradually changed.**

|    | Metal-ligand<br>bonds<br>(kcal/mol/Å <sup>2</sup> ) | Backbone<br>atoms bonds<br>(kcal/mol/Å <sup>2</sup> ) | Angles<br>(kcal/mol/rad <sup>2</sup> ) | Dihedrals<br>(kcal/mol/rad <sup>2</sup> ) | Improper<br>torsions<br>(kcal/mol/rad <sup>2</sup> ) | Secondary<br>structure<br>(kcal/mol/rad <sup>2</sup> ) | Dummy<br>Delta<br>(Å) | Time<br>(ns) |
|----|-----------------------------------------------------|-------------------------------------------------------|----------------------------------------|-------------------------------------------|------------------------------------------------------|--------------------------------------------------------|-----------------------|--------------|
| 1  | 1.0                                                 | 0.2                                                   | 1.0                                    | 1.0                                       | 1.0                                                  | 500.0                                                  | 2                     | 2            |
| 2  | 2.0                                                 | 0.5                                                   | 2.0                                    | 2.0                                       | 2.0                                                  | 500.0                                                  | 2                     | 2            |
| 3  | 5.0                                                 | 1.0                                                   | 5.0                                    | 5.0                                       | 5.0                                                  | 500.0                                                  | 2                     | 2            |
| 4  | 10.0                                                | 2.0                                                   | 10.0                                   | 10.0                                      | 10.0                                                 | 500.0                                                  | 2                     | 2            |
| 5  | 10.0                                                | 5.0                                                   | 10.0                                   | 10.0                                      | 10.0                                                 | 500.0                                                  | 2                     | 2            |
| 6  | 10.0                                                | 10.0                                                  | 10.0                                   | 10.0                                      | 10.0                                                 | 500.0                                                  | 2                     | 2            |
| 7  | 10.0                                                | 20.0                                                  | 10.0                                   | 10.0                                      | 10.0                                                 | 500.0                                                  | 2                     | 2            |
| 8  | 10.0                                                | 50.0                                                  | 10.0                                   | 10.0                                      | 10.0                                                 | 400.0                                                  | 2                     | 2            |
| 9  | 10.0                                                | 50.0                                                  | 10.0                                   | 10.0                                      | 10.0                                                 | 300.0                                                  | 2                     | 2            |
| 10 | 10.0                                                | 50.0                                                  | 10.0                                   | 10.0                                      | 10.0                                                 | 200.0                                                  | 2                     | 2            |
| 11 | 10.0                                                | 50.0                                                  | 10.0                                   | 10.0                                      | 10.0                                                 | 100.0                                                  | 1                     | 80           |
